# Supplementary material
Source: Copernicus journal article supplement (doi:10.5194/egusphere-2026-3352)

# Supplement

**Table S1 Out-of-fold (OOF) blocked cross-validation skill metrics for the monthly statistical reconstructions over the calibration period 1930-1994 in the SA9 domain. Model performance is reported for LASSO and Random Forest models using root mean square error (RMSE), Pearson's correlation coefficient (R), Spearman's rank correlation coefficient ( $\rho$ ), mean absolute error (MAE) and percent bias (PBIAS). Ensemble predictions are derived from a weighted combination of the two models, with weights computed from inverse-squared RMSE values and normalised within each month.**

| 1930-1994<br>Month/Season | Lasso |             |                   |       |       |        | Random Forest |             |                   |       |       |        | Ensemble |             |                   |       |       |
|---------------------------|-------|-------------|-------------------|-------|-------|--------|---------------|-------------|-------------------|-------|-------|--------|----------|-------------|-------------------|-------|-------|
|                           | RMSE  | Pearson's R | Spearman's $\rho$ | MAE   | PBIAS | Weight | RMSE          | Pearson's R | Spearman's $\rho$ | MAE   | PBIAS | Weight | RMSE     | Pearson's R | Spearman's $\rho$ | MAE   | PBIAS |
| <b>Jan</b>                | 19.92 | 0.82        | 0.80              | 15.14 | 0.22  | 0.57   | 23.04         | 0.74        | 0.74              | 17.86 | 0.38  | 0.43   | 20.51    | 0.80        | 0.79              | 15.80 | 0.29  |
| <b>Feb</b>                | 17.38 | 0.85        | 0.87              | 13.37 | 0.57  | 0.58   | 20.61         | 0.79        | 0.82              | 16.38 | 0.00  | 0.42   | 18.04    | 0.84        | 0.86              | 13.99 | 0.33  |
| <b>Mar</b>                | 19.36 | 0.77        | 0.71              | 15.78 | -0.88 | 0.56   | 21.86         | 0.70        | 0.68              | 17.39 | -0.19 | 0.44   | 20.16    | 0.75        | 0.71              | 16.29 | -0.58 |
| <b>Apr</b>                | 14.90 | 0.78        | 0.80              | 11.03 | 1.04  | 0.57   | 17.05         | 0.71        | 0.72              | 13.21 | 2.78  | 0.43   | 15.42    | 0.77        | 0.78              | 11.71 | 1.79  |
| <b>May</b>                | 21.84 | 0.76        | 0.79              | 16.56 | -0.40 | 0.59   | 26.18         | 0.63        | 0.66              | 19.27 | 0.36  | 0.41   | 22.91    | 0.74        | 0.76              | 16.58 | -0.09 |
| <b>Jun</b>                | 22.38 | 0.72        | 0.72              | 17.83 | -0.38 | 0.54   | 24.02         | 0.67        | 0.67              | 18.33 | 2.64  | 0.46   | 22.74    | 0.71        | 0.72              | 17.77 | 1.03  |
| <b>Jul</b>                | 21.74 | 0.73        | 0.75              | 17.30 | -0.78 | 0.53   | 22.89         | 0.69        | 0.73              | 18.85 | -0.43 | 0.47   | 22.10    | 0.72        | 0.73              | 17.98 | -0.61 |
| <b>Aug</b>                | 22.69 | 0.76        | 0.77              | 18.31 | 0.14  | 0.53   | 24.03         | 0.74        | 0.74              | 19.79 | 1.26  | 0.47   | 22.85    | 0.76        | 0.77              | 18.66 | 0.66  |
| <b>Sep</b>                | 25.99 | 0.72        | 0.75              | 20.76 | -0.28 | 0.53   | 27.37         | 0.68        | 0.67              | 22.37 | -1.14 | 0.47   | 26.11    | 0.71        | 0.72              | 20.98 | -0.69 |
| <b>Oct</b>                | 24.80 | 0.78        | 0.79              | 18.83 | 1.10  | 0.54   | 26.66         | 0.73        | 0.73              | 20.74 | 0.65  | 0.46   | 25.15    | 0.77        | 0.78              | 19.08 | 0.89  |
| <b>Nov</b>                | 25.37 | 0.73        | 0.75              | 19.09 | 0.47  | 0.52   | 26.29         | 0.70        | 0.71              | 20.06 | -0.46 | 0.48   | 25.39    | 0.73        | 0.76              | 18.93 | 0.02  |
| <b>Dec</b>                | 24.45 | 0.73        | 0.70              | 19.17 | -1.12 | 0.54   | 26.55         | 0.67        | 0.67              | 19.88 | -0.46 | 0.46   | 24.38    | 0.73        | 0.71              | 18.13 | -0.82 |
| <b>Annual</b>             | 81.55 | 0.70        | 0.70              | 65.63 | -0.03 | -      | 85.62         | 0.66        | 0.67              | 67.39 | 0.36  | -      | 81.30    | 0.69        | 0.70              | 64.98 | 0.14  |
| <b>Winter</b>             | 39.50 | 0.80        | 0.79              | 30.96 | -0.24 | -      | 44.97         | 0.73        | 0.73              | 34.52 | -0.13 | -      | 40.78    | 0.78        | 0.77              | 31.42 | -0.18 |
| <b>Spring</b>             | 33.92 | 0.76        | 0.75              | 25.39 | -0.12 | -      | 36.69         | 0.72        | 0.72              | 27.49 | 0.91  | -      | 34.23    | 0.76        | 0.75              | 25.24 | 0.32  |
| <b>Summer</b>             | 41.23 | 0.74        | 0.76              | 31.23 | -0.32 | -      | 42.62         | 0.71        | 0.75              | 31.73 | 1.13  | -      | 41.15    | 0.74        | 0.76              | 31.00 | 0.36  |
| <b>Autumn</b>             | 45.33 | 0.72        | 0.72              | 36.26 | 0.43  | -      | 50.72         | 0.64        | 0.63              | 39.80 | -0.31 | -      | 46.99    | 0.69        | 0.68              | 37.18 | 0.08  |
| <b>MJJA</b>               | 45.29 | 0.77        | 0.74              | 35.73 | -0.34 | -      | 48.80         | 0.73        | 0.73              | 37.73 | 0.94  | -      | 45.62    | 0.77        | 0.77              | 36.03 | 0.25  |

**Table S2 Out-of-fold (OOF) blocked cross-validation skill metrics for the monthly statistical reconstructions over the calibration period 1930-1994 in the SA-upland domain. Model performance is reported for LASSO and Random Forest models using root mean square error (RMSE), Pearson's correlation coefficient (R), Spearman's rank correlation coefficient ( $\rho$ ), mean absolute error (MAE) and percent bias (PBIAS). Ensemble predictions are derived from a weighted combination of the two models, with weights computed from inverse-squared RMSE values and normalised within each month.**

| 1930-1994<br>Month | Lasso  |             |                   |        |       |        | Random Forest |             |                   |        |       |        | Ensemble |             |                   |        |       |
|--------------------|--------|-------------|-------------------|--------|-------|--------|---------------|-------------|-------------------|--------|-------|--------|----------|-------------|-------------------|--------|-------|
|                    | RMSE   | Pearson's R | Spearman's $\rho$ | MAE    | PBIAS | Weight | RMSE          | Pearson's R | Spearman's $\rho$ | MAE    | PBIAS | Weight | RMSE     | Pearson's R | Spearman's $\rho$ | MAE    | PBIAS |
| Jan                | 33.65  | 0.80        | 0.79              | 26.67  | -0.75 | 0.57   | 38.97         | 0.72        | 0.71              | 31.43  | 0.31  | 0.43   | 35.11    | 0.78        | 0.76              | 28.09  | -0.30 |
| Feb                | 26.74  | 0.85        | 0.87              | 20.72  | 0.26  | 0.59   | 31.95         | 0.77        | 0.80              | 25.00  | -0.06 | 0.41   | 27.71    | 0.83        | 0.85              | 22.10  | 0.13  |
| Mar                | 31.00  | 0.77        | 0.71              | 25.15  | -0.24 | 0.56   | 34.75         | 0.70        | 0.67              | 28.69  | -0.35 | 0.44   | 32.28    | 0.75        | 0.71              | 26.64  | -0.29 |
| Apr                | 22.81  | 0.78        | 0.77              | 17.52  | 0.96  | 0.55   | 25.20         | 0.72        | 0.71              | 19.78  | -0.52 | 0.45   | 23.25    | 0.77        | 0.75              | 18.23  | 0.29  |
| May                | 30.25  | 0.79        | 0.82              | 22.56  | -0.08 | 0.57   | 34.76         | 0.72        | 0.73              | 25.07  | 0.26  | 0.43   | 31.06    | 0.78        | 0.80              | 22.21  | 0.07  |
| Jun                | 25.59  | 0.77        | 0.76              | 20.65  | -0.40 | 0.56   | 28.73         | 0.70        | 0.69              | 22.55  | 1.95  | 0.44   | 26.22    | 0.76        | 0.75              | 21.16  | 0.64  |
| Jul                | 24.89  | 0.82        | 0.84              | 19.63  | -1.99 | 0.55   | 27.74         | 0.76        | 0.78              | 22.31  | 0.04  | 0.45   | 24.96    | 0.81        | 0.84              | 19.64  | -1.09 |
| Aug                | 32.68  | 0.77        | 0.82              | 25.43  | 0.27  | 0.50   | 32.79         | 0.77        | 0.82              | 25.22  | 1.25  | 0.50   | 31.82    | 0.79        | 0.83              | 24.62  | 0.76  |
| Sep                | 32.70  | 0.78        | 0.79              | 26.84  | -0.18 | 0.56   | 36.92         | 0.71        | 0.68              | 31.21  | -0.87 | 0.44   | 33.56    | 0.77        | 0.76              | 28.11  | -0.48 |
| Oct                | 36.62  | 0.75        | 0.78              | 27.78  | 0.10  | 0.53   | 38.64         | 0.71        | 0.72              | 30.14  | 0.56  | 0.47   | 35.47    | 0.77        | 0.79              | 27.20  | 0.31  |
| Nov                | 38.41  | 0.73        | 0.75              | 29.17  | 0.04  | 0.53   | 40.47         | 0.69        | 0.67              | 32.15  | -0.64 | 0.47   | 38.58    | 0.72        | 0.73              | 29.84  | -0.28 |
| Dec                | 35.67  | 0.77        | 0.76              | 29.25  | -0.13 | 0.57   | 41.46         | 0.67        | 0.65              | 34.35  | -0.55 | 0.43   | 37.13    | 0.75        | 0.72              | 30.22  | -0.31 |
| Annual             | 128.11 | 0.67        | 0.66              | 102.93 | -0.18 | -      | 134.55        | 0.63        | 0.63              | 107.92 | 0.05  | -      | 127.48   | 0.67        | 0.66              | 102.24 | -0.08 |
| Winter             | 60.45  | 0.82        | 0.83              | 49.58  | -0.59 | -      | 72.23         | 0.73        | 0.73              | 58.77  | -0.44 | -      | 64.36    | 0.79        | 0.81              | 53.20  | -0.52 |
| Spring             | 52.68  | 0.77        | 0.76              | 39.54  | 0.17  | -      | 54.18         | 0.76        | 0.75              | 39.65  | -0.21 | -      | 52.15    | 0.78        | 0.78              | 38.52  | 0.00  |
| Summer             | 51.04  | 0.78        | 0.79              | 38.98  | -0.68 | -      | 50.85         | 0.77        | 0.80              | 37.36  | 1.05  | -      | 49.08    | 0.79        | 0.80              | 36.68  | 0.11  |
| Autumn             | 69.29  | 0.70        | 0.70              | 55.42  | -0.01 | -      | 77.45         | 0.61        | 0.58              | 61.80  | -0.31 | -      | 70.90    | 0.68        | 0.68              | 56.17  | -0.15 |
| MJJA               | 56.42  | 0.80        | 0.77              | 43.94  | -0.53 | -      | 59.97         | 0.77        | 0.77              | 45.56  | 0.85  | -      | 55.26    | 0.81        | 0.81              | 43.69  | 0.10  |

**Table S3 Robustness estimates for the calibration period for the SA9 (top) and SA-upland (bottom) rainfall reconstruction using a true split-period approach, based on the tree-ring  $\delta^{18}\text{O}$ -based reconstruction. Two configurations are shown: calibration over 1930-1965 with verification over 1966-2000, and its reverse arrangement. Model performance is evaluated using root mean square error (RMSE), Pearson's correlation coefficient (R), mean absolute error (MAE) and percent bias (PBIAS), computed from paired observed and reconstructed values within each verification period.**

| Domain    | Model                               | Cal/Val     | Period    | RMSE  | Pearson's R | MAE   | PBIAS |
|-----------|-------------------------------------|-------------|-----------|-------|-------------|-------|-------|
| SA9       | Early calibration - Late validation | calibration | 1930-1965 | 68.71 | 0.54        | 54.62 | >0.01 |
|           |                                     | validation  | 1966-2000 | 62.71 | 0.55        | 48.57 | 4.65  |
|           | Late calibration - Early validation | calibration | 1966-2000 | 62.66 | 0.55        | 47.70 | >0.01 |
|           |                                     | validation  | 1930-1965 | 70.94 | 0.54        | 55.65 | -3.87 |
| SA-upland | Early calibration - Late validation | calibration | 1930-1965 | 90.13 | 0.52        | 73.19 | >0.01 |
|           |                                     | validation  | 1966-2000 | 85.64 | 0.54        | 68.59 | 5.06  |
|           | Late calibration - Early validation | calibration | 1966-2000 | 88.45 | 0.54        | 70.64 | >0.01 |
|           |                                     | validation  | 1930-1965 | 97.45 | 0.52        | 80.34 | -3.61 |

**Table S4 Top 20 wettest and driest years (1865-1977) for observations and reconstructions. Years highlighted by bold are extreme years present in both the Jenkinson and statistical reconstructions' top 20.**

|         | SA9      |             |               |             |               |      | SAupland      |             |               |             |               |      |               |
|---------|----------|-------------|---------------|-------------|---------------|------|---------------|-------------|---------------|-------------|---------------|------|---------------|
|         | Ensemble |             | Jenkinson     |             | Observed      |      | Ensemble      |             | Jenkinson     |             | Observed      |      |               |
|         | Rank     | Year        | Annual totals | Year        | Annual totals | Year | Annual totals | Year        | Annual totals | Year        | Annual totals | Year | Annual totals |
| Wettest | 1        | <b>1872</b> | 1153.27       | <b>1872</b> | 1154.17       | 1960 | 1208.93       | <b>1872</b> | 1660.34       | <b>1872</b> | 1638.94       | 1960 | 1768.61       |
|         | 2        | <b>1903</b> | 1122.18       | <b>1960</b> | 1133.33       | 1958 | 1159.96       | 1924        | 1632.35       | <b>1960</b> | 1609.35       | 1872 | 1687.71       |
|         | 3        | <b>1924</b> | 1096.77       | 1928        | 1128.8        | 1872 | 1158.39       | <b>1903</b> | 1630.54       | <b>1928</b> | 1602.92       | 1882 | 1685.83       |
|         | 4        | 1927        | 1096.4        | <b>1903</b> | 1110.68       | 1916 | 1137.06       | <b>1960</b> | 1586.84       | <b>1903</b> | 1577.19       | 1966 | 1680.39       |
|         | 5        | <b>1960</b> | 1090.16       | <b>1958</b> | 1106.15       | 1882 | 1132.84       | <b>1930</b> | 1586.51       | <b>1958</b> | 1570.76       | 1958 | 1626.59       |
|         | 6        | <b>1877</b> | 1080.06       | <b>1877</b> | 1105.25       | 1900 | 1128.88       | 1927        | 1577.51       | <b>1877</b> | 1569.47       | 1877 | 1624.63       |
|         | 7        | <b>1930</b> | 1077.94       | <b>1924</b> | 1092.57       | 1966 | 1126.04       | 1951        | 1543.36       | 1924        | 1551.46       | 1946 | 1619.84       |
|         | 8        | <b>1958</b> | 1063.09       | <b>1954</b> | 1074.45       | 1930 | 1109.67       | 1912        | 1538.36       | <b>1954</b> | 1525.73       | 1930 | 1586.8        |
|         | 9        | 1951        | 1060.72       | <b>1966</b> | 1055.42       | 1877 | 1105.93       | <b>1958</b> | 1528.91       | <b>1966</b> | 1498.72       | 1947 | 1568.63       |
|         | 10       | <b>1910</b> | 1043.5        | <b>1882</b> | 1052.7        | 1946 | 1100.82       | 1866        | 1518.27       | <b>1882</b> | 1494.86       | 1876 | 1554          |
|         | 11       | <b>1916</b> | 1042.48       | 1938        | 1048.17       | 1947 | 1089.29       | <b>1966</b> | 1516.16       | 1938        | 1488.43       | 1965 | 1553.6        |
|         | 12       | 1912        | 1038.91       | <b>1948</b> | 1043.64       | 1910 | 1075.85       | <b>1877</b> | 1508.8        | <b>1948</b> | 1481.99       | 1928 | 1550.84       |
|         | 13       | 1866        | 1038.05       | <b>1930</b> | 1039.12       | 1924 | 1068.04       | <b>1928</b> | 1492.29       | <b>1930</b> | 1475.56       | 1900 | 1532.24       |
|         | 14       | <b>1966</b> | 1031.56       | <b>1965</b> | 1030.96       | 1876 | 1066.89       | <b>1882</b> | 1491.58       | <b>1965</b> | 1463.98       | 1897 | 1512.36       |
|         | 15       | <b>1882</b> | 1029.09       | <b>1900</b> | 1030.06       | 1954 | 1055.99       | <b>1910</b> | 1487.87       | <b>1900</b> | 1462.7        | 1954 | 1490.82       |
|         | 16       | 1928        | 1028.06       | <b>1947</b> | 1023.71       | 1897 | 1052.97       | 1950        | 1486.69       | <b>1947</b> | 1453.69       | 1875 | 1480.57       |
|         | 17       | <b>1965</b> | 1027.51       | <b>1916</b> | 1021          | 1965 | 1050.03       | <b>1965</b> | 1477.8        | 1916        | 1449.83       | 1910 | 1480.54       |
|         | 18       | <b>1954</b> | 1025.44       | <b>1946</b> | 1016.47       | 1948 | 1037.74       | <b>1954</b> | 1469.54       | <b>1946</b> | 1443.4        | 1977 | 1474.65       |
|         | 19       | 1891        | 1020.18       | <b>1897</b> | 1015.56       | 1931 | 1036.82       | <b>1946</b> | 1464.8        | <b>1897</b> | 1442.11       | 1948 | 1472.72       |
|         | 20       | 1950        | 1017.93       | 1950        | 1011.94       | 1903 | 1030.08       | 1916        | 1460.58       | 1950        | 1436.97       | 1903 | 1468.65       |
| Driest  | 1        | <b>1921</b> | 673.58        | <b>1887</b> | 647.75        | 1887 | 559.75        | <b>1921</b> | 988.08        | <b>1887</b> | 919.81        | 1887 | 718.29        |
|         | 2        | 1973        | 739.42        | <b>1933</b> | 689.42        | 1971 | 682.73        | <b>1887</b> | 1023.07       | <b>1933</b> | 978.99        | 1971 | 898.75        |
|         | 3        | <b>1887</b> | 741.07        | <b>1893</b> | 695.76        | 1893 | 685.13        | 1973        | 1035.45       | <b>1893</b> | 988           | 1884 | 945.18        |
|         | 4        | <b>1949</b> | 757.23        | <b>1971</b> | 719.32        | 1933 | 688.9         | <b>1975</b> | 1078.82       | <b>1971</b> | 1021.44       | 1873 | 946.06        |
|         | 5        | <b>1975</b> | 758.89        | <b>1953</b> | 770.05        | 1884 | 720.54        | <b>1949</b> | 1093.41       | <b>1953</b> | 1093.48       | 1870 | 994.85        |
|         | 6        | <b>1971</b> | 761.56        | <b>1975</b> | 775.49        | 1922 | 724.34        | <b>1933</b> | 1099.82       | <b>1975</b> | 1101.2        | 1921 | 1002.36       |
|         | 7        | <b>1870</b> | 766.43        | <b>1952</b> | 779.11        | 1949 | 726.2         | <b>1971</b> | 1102.76       | <b>1952</b> | 1106.35       | 1922 | 1009.13       |
|         | 8        | <b>1933</b> | 766.51        | <b>1870</b> | 781.83        | 1953 | 726.69        | <b>1870</b> | 1115.83       | <b>1870</b> | 1110.21       | 1933 | 1021.02       |
|         | 9        | <b>1953</b> | 785.08        | 1941        | 783.64        | 1975 | 733.45        | <b>1953</b> | 1129.92       | 1941        | 1112.78       | 1949 | 1023.62       |
|         | 10       | 1976        | 788.3         | <b>1921</b> | 788.17        | 1873 | 743.12        | <b>1905</b> | 1151.42       | <b>1921</b> | 1119.21       | 1917 | 1038.97       |
|         | 11       | 1956        | 800.48        | <b>1969</b> | 794.51        | 1870 | 748.28        | 1955        | 1157.18       | <b>1969</b> | 1128.22       | 1893 | 1040.76       |
|         | 12       | 1955        | 804.95        | <b>1905</b> | 797.23        | 1921 | 754.79        | 1976        | 1161.66       | <b>1905</b> | 1132.08       | 1975 | 1050.12       |
|         | 13       | <b>1905</b> | 817.73        | 1955        | 808.1         | 1945 | 760.96        | 1956        | 1166.54       | 1955        | 1147.52       | 1953 | 1050.17       |
|         | 14       | 1962        | 829.42        | 1919        | 815.35        | 1952 | 765.73        | 1896        | 1172.64       | <b>1919</b> | 1157.81       | 1905 | 1055.14       |
|         | 15       | 1896        | 832.88        | <b>1885</b> | 819.88        | 1905 | 768.38        | 1874        | 1199.22       | <b>1885</b> | 1164.24       | 1885 | 1072.53       |
|         | 16       | <b>1945</b> | 834.85        | 1889        | 820.78        | 1906 | 776.63        | 1944        | 1200.97       | 1889        | 1165.53       | 1869 | 1077.32       |
|         | 17       | 1944        | 841.14        | <b>1922</b> | 823.5         | 1961 | 787.72        | 1964        | 1202.97       | <b>1922</b> | 1169.39       | 1919 | 1087.57       |
|         | 18       | 1964        | 847.33        | 1902        | 823.5         | 1904 | 793.12        | <b>1969</b> | 1211.33       | 1902        | 1169.39       | 1969 | 1092.94       |
|         | 19       | 1959        | 850.66        | 1909        | 832.56        | 1969 | 794.41        | 1962        | 1212.76       | 1906        | 1182.25       | 1935 | 1098.78       |
|         | 20       | 1899        | 851.32        | <b>1906</b> | 832.56        | 1885 | 800.38        | <b>1952</b> | 1219.92       | 1909        | 1182.25       | 1952 | 1105.85       |

**Table S5 Jaccard Index (JI) scores for the agreement between reconstructed and observed rainfall in identifying the top 20 wettest and driest years in SA9 across annual and seasonal aggregations. Results are shown for the Jenkinson reconstruction, statistical ensemble (ENS), and  $\delta^{18}\text{O}$  based reconstruction (MJJA only), all compared against observations over the period 1865-1977. The numerator represents the number of years common to both the reconstruction and observed top-20 lists (intersection), while the denominator represents the total number of unique years across both lists (union). JI values range from 0 (no overlap) to 1 (complete agreement), with higher values indicating greater consistency in the identification of extreme years.**

| Series | Model vs Obs. | Type    | Numerator | Denominator | JI   |
|--------|---------------|---------|-----------|-------------|------|
| ANN    | Jenk vs Obs.  | Wettest | 16        | 23          | 0.67 |
| ANN    | Jenk vs Obs.  | Driest  | 14        | 26          | 0.54 |
| ANN    | Ens vs Obs.   | Wettest | 13        | 27          | 0.48 |
| ANN    | Ens vs Obs.   | Driest  | 10        | 30          | 0.33 |
| DJF    | Jenk vs Obs.  | Wettest | 15        | 25          | 0.60 |
| DJF    | Jenk vs Obs.  | Driest  | 14        | 26          | 0.54 |
| DJF    | Ens vs Obs.   | Wettest | 14        | 26          | 0.54 |
| DJF    | Ens vs Obs.   | Driest  | 13        | 27          | 0.48 |
| MAM    | Jenk vs Obs.  | Wettest | 14        | 26          | 0.54 |
| MAM    | Jenk vs Obs.  | Driest  | 13        | 27          | 0.48 |
| MAM    | Ens vs Obs.   | Wettest | 10        | 30          | 0.33 |
| MAM    | Ens vs Obs.   | Driest  | 12        | 28          | 0.43 |
| JJA    | Jenk vs Obs.  | Wettest | 15        | 25          | 0.60 |
| JJA    | Jenk vs Obs.  | Driest  | 15        | 25          | 0.60 |
| JJA    | Ens vs Obs.   | Wettest | 12        | 28          | 0.43 |
| JJA    | Ens vs Obs.   | Driest  | 12        | 28          | 0.43 |
| SON    | Jenk vs Obs.  | Wettest | 11        | 29          | 0.38 |
| SON    | Jenk vs Obs.  | Driest  | 16        | 24          | 0.67 |
| SON    | Ens vs Obs.   | Wettest | 10        | 30          | 0.33 |
| SON    | Ens vs Obs.   | Driest  | 14        | 26          | 0.54 |
| MJJA   | Jenk vs Obs.  | Wettest | 15        | 25          | 0.60 |
| MJJA   | Jenk vs Obs.  | Driest  | 16        | 24          | 0.67 |
| MJJA   | Ens vs Obs.   | Wettest | 12        | 28          | 0.43 |
| MJJA   | Ens vs Obs.   | Driest  | 12        | 28          | 0.43 |
| MJJA   | Trees vs Obs. | Wettest | 11        | 29          | 0.38 |
| MJJA   | Trees vs Obs. | Driest  | 9         | 31          | 0.29 |

**Table S6 Jaccard Index (JI) scores for the agreement between reconstructed and observed rainfall in identifying the top 20 wettest and driest years in SA-upland across annual and seasonal aggregations. Results are shown for the Jenkinson reconstruction, statistical ensemble (ENS), and  $\delta^{18}\text{O}$  based reconstruction (MJJA only), all compared against observations over the period 1865-1977. The numerator represents the number of years common to both the reconstruction and observed top-20 lists (intersection), while the denominator represents the total number of unique years across both lists (union). JI values range from 0 (no overlap) to 1 (complete agreement), with higher values indicating greater consistency in the identification of extreme years.**

| Series | Model vs Obs. | Type    | Numerator | Denominator | JI   |
|--------|---------------|---------|-----------|-------------|------|
| ANN    | Jenk vs Obs.  | Wettest | 16        | 24          | 0.67 |
| ANN    | Jenk vs Obs.  | Driest  | 14        | 26          | 0.54 |
| ANN    | Ens vs Obs.   | Wettest | 13        | 27          | 0.48 |
| ANN    | Ens vs Obs.   | Driest  | 11        | 29          | 0.38 |
| DJF    | Jenk vs Obs.  | Wettest | 13        | 27          | 0.48 |
| DJF    | Jenk vs Obs.  | Driest  | 14        | 26          | 0.54 |
| DJF    | Ens vs Obs.   | Wettest | 13        | 27          | 0.48 |
| DJF    | Ens vs Obs.   | Driest  | 13        | 27          | 0.48 |
| MAM    | Jenk vs Obs.  | Wettest | 14        | 26          | 0.54 |
| MAM    | Jenk vs Obs.  | Driest  | 13        | 27          | 0.48 |
| MAM    | Ens vs Obs.   | Wettest | 13        | 27          | 0.48 |
| MAM    | Ens vs Obs.   | Driest  | 13        | 27          | 0.48 |
| JJA    | Jenk vs Obs.  | Wettest | 16        | 24          | 0.67 |
| JJA    | Jenk vs Obs.  | Driest  | 15        | 25          | 0.60 |
| JJA    | Ens vs Obs.   | Wettest | 14        | 26          | 0.54 |
| JJA    | Ens vs Obs.   | Driest  | 13        | 27          | 0.48 |
| SON    | Jenk vs Obs.  | Wettest | 12        | 28          | 0.43 |
| SON    | Jenk vs Obs.  | Driest  | 14        | 26          | 0.54 |
| SON    | Ens vs Obs.   | Wettest | 12        | 28          | 0.43 |
| SON    | Ens vs Obs.   | Driest  | 10        | 30          | 0.33 |
| MJJA   | Jenk vs Obs.  | Wettest | 13        | 27          | 0.48 |
| MJJA   | Jenk vs Obs.  | Driest  | 16        | 24          | 0.67 |
| MJJA   | Ens vs Obs.   | Wettest | 13        | 27          | 0.48 |
| MJJA   | Ens vs Obs.   | Driest  | 16        | 24          | 0.67 |
| MJJA   | Trees vs Obs. | Wettest | 9         | 31          | 0.29 |
| MJJA   | Trees vs Obs. | Driest  | 10        | 30          | 0.33 |

Figure S1 Extended Dublin Snow and Sleet (DSS) series (1748-1974). Annual number of days with observed snow and/or sleet (black), with 10-year running mean (blue).

### Extended Dublin Snow/Sleet Series

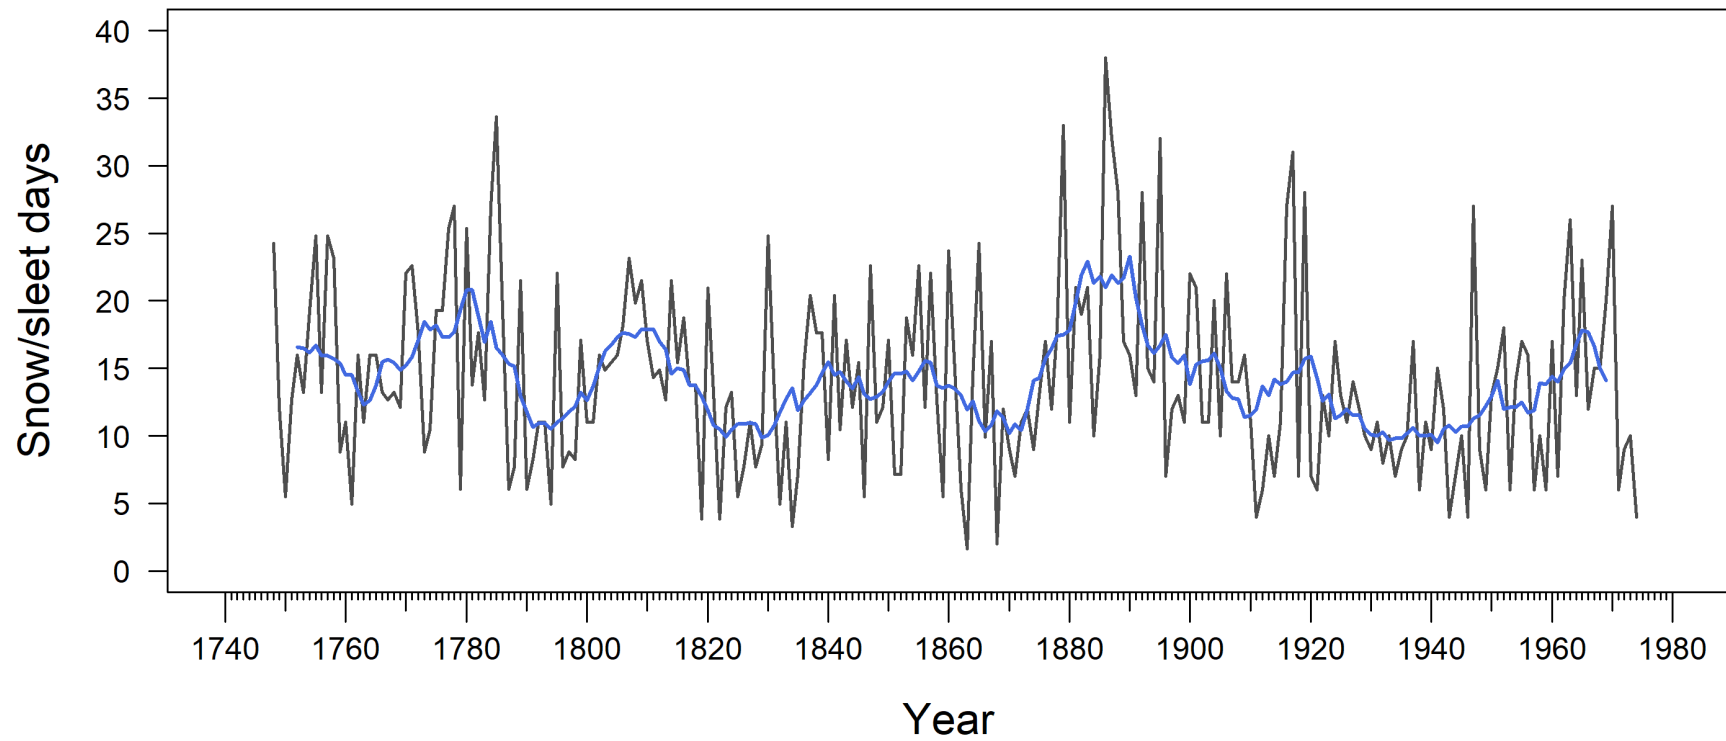

Supplement: Supplementary file 1 [file egusphere-2026-3352-supplement.pdf]
